# Supplementary material for: Oxidative chemical vapor deposition of polyaniline thin films
Source: publisher site journal article supplement (doi:10.3762/bjnano.8.128), 2017-06-16
Supplement: Additional file 1 [file 2190-4286-8-128-S1.pdf]

# Supporting Information

for

## Oxidative chemical vapor deposition of polyaniline thin films

Yuriy Y. Smolin<sup>‡</sup>, Masoud Soroush<sup>‡</sup> and Kenneth K. S. Lau<sup>\*‡</sup>

Address: Department of Chemical and Biological Engineering, Drexel University,  
Philadelphia, PA 19104, USA

Email: Kenneth K. S. Lau - [klau@drexel.edu](mailto:klau@drexel.edu)

\* Corresponding author

‡ Equal contributors

## Additional data

## Scanning Electron Microscopy

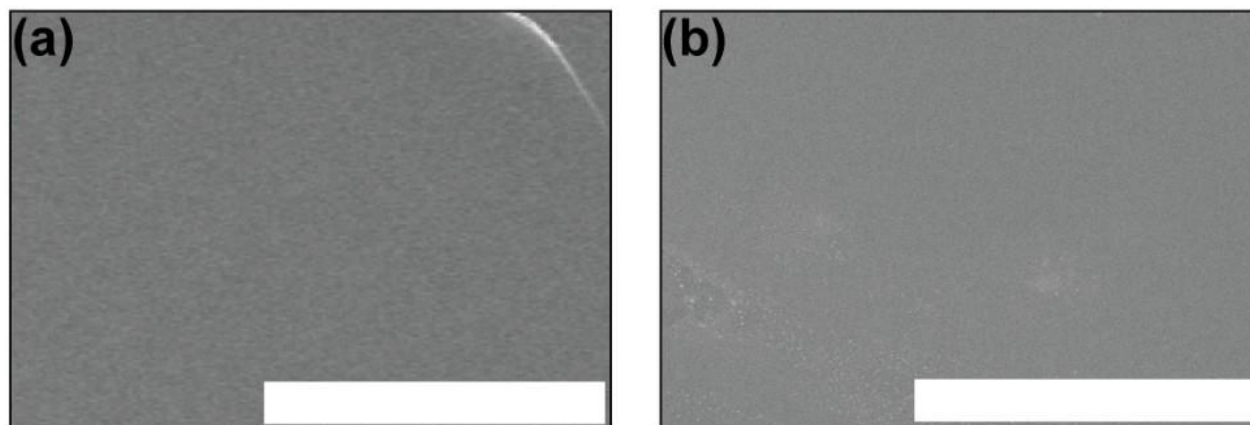

**Figure S1:** Top-down SEM of (a) as-deposited, and (b) THF-washed oCVD PANI films at lower magnification. Scale bar is 10  $\mu\text{m}$ .

## Fourier Transform Infrared Spectroscopy

**Table S1:** Major FTIR peak positions and assignments for oCVD PANI.

| Peak Position ( $\text{cm}^{-1}$ ) | Peak Assignment                            | Reference (in main paper) |
|------------------------------------|--------------------------------------------|---------------------------|
| 3304                               | NH stretch                                 | [44-46]                   |
| 3100–3000                          | CH stretch                                 | [44-46]                   |
| 1168–1160                          | $-\text{NH}^+=$ stretch / CH vibration     | [46,47]                   |
| 865–821                            | CH vibration (out-of-plane)                | [47-49]                   |
| 1588–1577                          | Quinoid ring stretch                       | [50,51]                   |
| 1510–1490                          | Benzenoid ring stretch                     | [50,51]                   |
| 1382                               | CN stretch of quinoid ring                 | [50]                      |
| 1635                               | NH scissoring vibration of aromatic amines | [52]                      |
| 749                                | CH out-of-plane bending                    | [48]                      |
| 688                                | CH out-of-plane ring deformation           | [48]                      |

## X-ray Photoelectron Spectroscopy

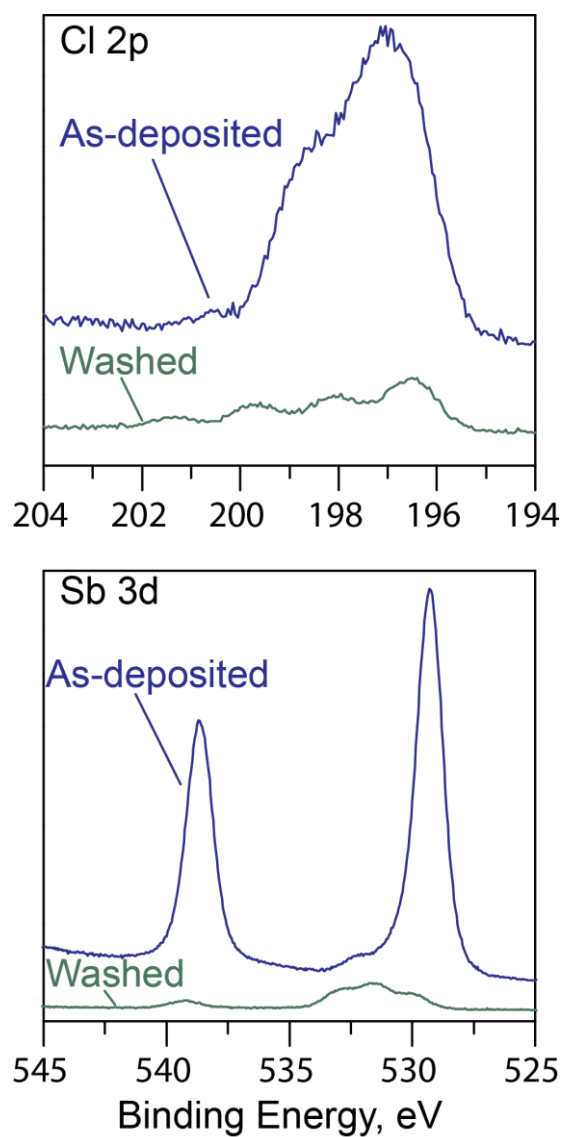

**Figure S2:** High-resolution Cl2p (top) and Sb3d (bottom) XPS spectra of as-deposited (blue) and washed (green) oCVD PANI films.
